# Supplementary material
Source: HighWire-hosted journal article supplement (https://jnis.bmj.com/content/11/7/659)
Supplement: inline-supplementary-material-1 [file inline-supplementary-material-1.pdf]

## Supplemental Materials

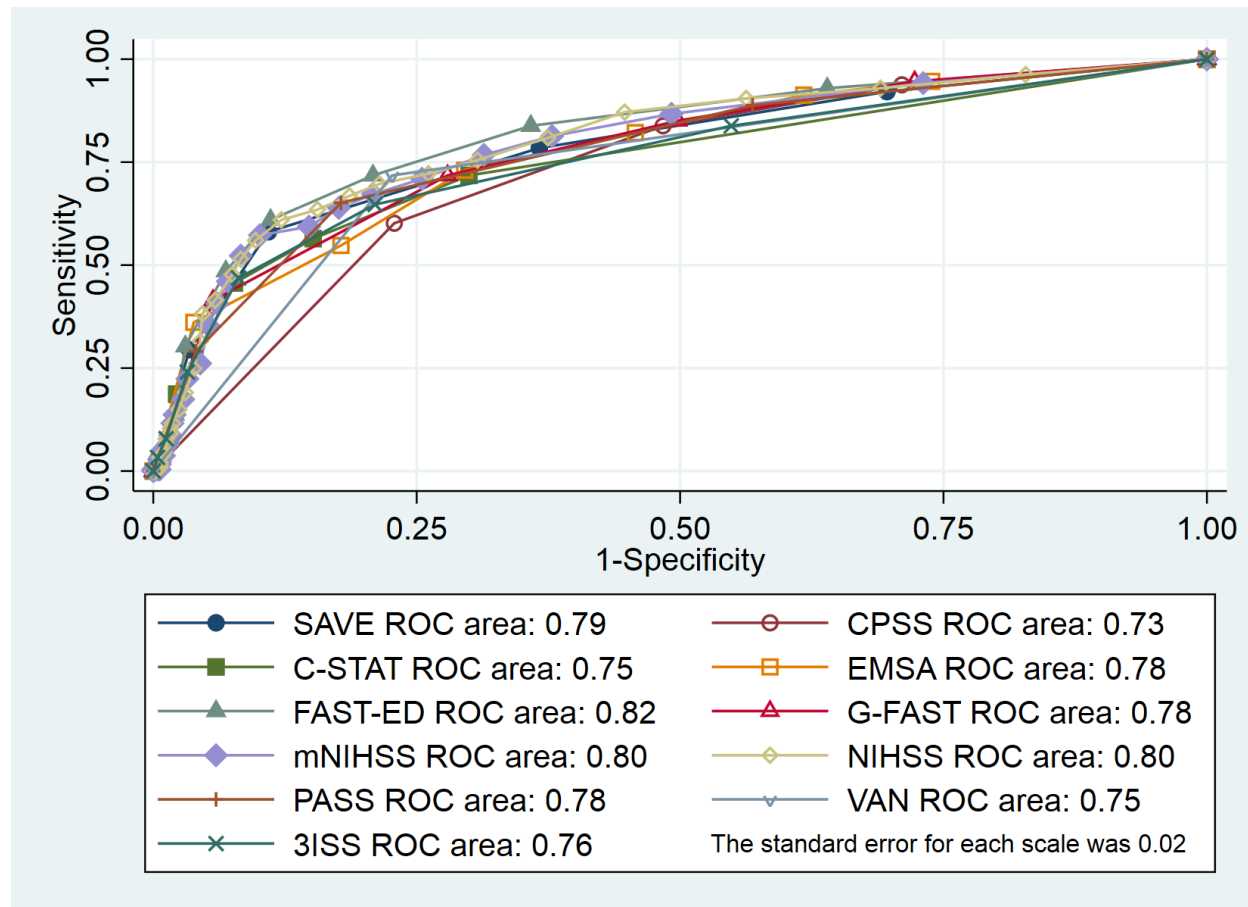

**Supplemental Figure 1.** Receiver Operating Characteristic Curves for each tested scale.

ROC: Receiver Operating Characteristic; PLR: positive likelihood ratio; NLR: negative likelihood ratio; PPV: positive predictive value; NPV: negative predictive value; SAVE: Speech Arm Vision Eyes; EMSA Emergency Medical Stroke Assessment; FAST-ED: Field Assessment Stroke Triage for Emergency Destination; Modified National Institutes of Health Stroke Scale; NIHSS: National Institutes of Health Stroke Scale; RACE: Rapid Arterial Occlusion Evaluation; CPSS: Cincinnati Prehospital Stroke Scale; C-STAT: Cincinnati Stroke Triage Assessment Tool; G-FAST: Gaze-face-arm-speech-time; PASS: Prehospital Acute Stroke Severity Scale; VAN: Vision Aphasia Neglect; 3ISS: 3-Item Stroke Scale

**Supplemental Table 1.** Diagnostic test parameters of previously specified potential scale thresholds.

| Scale threshold                    | Sensitivity %<br>95% CI | Specificity %<br>95% CI | PLR<br>95% CI      | NLR<br>95% CI     | PPV %<br>95% CI | NPV %<br>95% CI | % of all patients |
|------------------------------------|-------------------------|-------------------------|--------------------|-------------------|-----------------|-----------------|-------------------|
| <b>CPSS <math>\geq 1</math></b>    | 94<br>90-96             | 29<br>25-3              | 1.32<br>1.24-1.41  | 0.22<br>0.13-0.36 | 39<br>35-43     | 91<br>85-95     | 79                |
| <b>C-STAT <math>\geq 2</math></b>  | 56<br>50-63             | 85<br>81-88             | 3.72<br>2.94-4.71  | 0.51<br>0.44-0.60 | 65<br>58-71     | 80<br>76-83     | 29                |
| <b>EMSA <math>\geq 3</math></b>    | 82<br>77-87             | 54<br>50-59             | 1.80<br>1.60-2.01  | 0.33<br>0.25-0.44 | 47<br>42-52     | 86<br>82-90     | 58                |
| <b>FAST-ED <math>\geq 3</math></b> | 72<br>66-77             | 79<br>75-83             | 3.44<br>2.85-4.16  | 0.36<br>0.29-0.44 | 63<br>57-68     | 85<br>82-88     | 38                |
| <b>FAST-ED <math>\geq 4</math></b> | 61<br>55-67             | 89<br>86-92             | 5.48<br>4.19-7.17  | 0.44<br>0.37-0.52 | 73<br>66-79     | 82<br>79-86     | 27                |
| <b>G-FAST <math>\geq 3</math></b>  | 72<br>66-77             | 72<br>68-76             | 2.57<br>2.18-3.02  | 0.39<br>0.32-48   | 56<br>50-61     | 84<br>80-87     | 42                |
| <b>G-FAST = 4</b>                  | 42<br>35-48             | 94<br>92-96             | 7.32<br>4.96-10.80 | 0.62<br>0.56-0.69 | 78<br>70-85     | 77<br>73-80     | 17                |
| <b>mNIHSS <math>\geq 5</math></b>  | 71<br>65-77             | 75<br>70-78             | 2.78<br>2.34-3.30  | 0.39<br>0.32-0.48 | 58<br>52-63     | 84<br>80-87     | 40                |
| <b>NIHSS <math>\geq 6</math></b>   | 76<br>70-81             | 69<br>65-73             | 2.45<br>2.11-2.85  | 0.35<br>0.28-0.45 | 55<br>49-60     | 85<br>81-89     | 45                |
| <b>NIHSS <math>\geq 10</math></b>  | 64<br>57-70             | 84<br>81-88             | 4.07<br>3.25-5.11  | 0.43<br>0.37-0.51 | 67<br>60-73     | 83<br>79-86     | 31                |
| <b>PASS <math>\geq 2</math></b>    | 65<br>59-71             | 82<br>79-86             | 3.66<br>2.96-4.51  | 0.42<br>0.36-0.51 | 64<br>58-70     | 83<br>79-86     | 33                |
| <b>RACE <math>\geq 5</math></b>    | 54<br>47-60             | 87<br>84-90             | 4.26<br>3.29-5.54  | 0.53<br>0.46-0.61 | 68<br>60-74     | 79<br>76-83     | 26                |
| <b>VAN = 1</b>                     | 72<br>66-77             | 77<br>73-81             | 3.17<br>2.64-3.79  | 0.37<br>0.30-0.45 | 61<br>55-66     | 85<br>81-88     | 39                |
| <b>3I-SS <math>\geq 4</math></b>   | 24<br>19-30             | 97<br>95-98             | 7.43<br>4.37-12.60 | 78<br>67-87       | 72<br>69-87     | 72<br>69-76     | 10                |

CI: Confidence Interval; PLR: positive likelihood ratio; NLR: negative likelihood ratio; PPV: positive predictive value; NPV: negative predictive value; CPSS: Cincinnati Prehospital Stroke Scale; C-STAT: Cincinnati Stroke Triage Assessment Tool; EMSA: Emergency Medical Stroke Assessment; FAST-ED: Field Assessment Stroke Triage for Emergency Destination; G-FAST: Gaze-face-arm-speech-time; mNIHSS: Modified National Institutes of Health Stroke Scale; NIHSS: National Institutes of Health Stroke Scale; PASS: Prehospital Acute Stroke Severity; RACE: Rapid Arterial Occlusion Evaluation; VAN: Vision Aphasia Neglect; 3I-SS: 3-Item Stroke Scale

**Supplemental Table 2.** Diagnostic test parameters of each CPSS scale threshold.

| Scale threshold                  | Sensitivity %<br>95% CI | Specificity %<br>95% CI | PLR<br>95% CI     | NLR<br>95% CI     | PPV %<br>95% CI | NPV %<br>95% CI | % of all patients |
|----------------------------------|-------------------------|-------------------------|-------------------|-------------------|-----------------|-----------------|-------------------|
| <b>CPSS <math>\geq 1</math>*</b> | 94<br>90-96             | 29<br>25-3              | 1.32<br>1.24-1.41 | 0.22<br>0.13-0.36 | 39<br>35-43     | 91<br>85-95     | 79                |
| <b>CPSS <math>\geq 2</math></b>  | 84<br>79-88             | 52<br>47-56             | 1.73<br>1.56-1.93 | 0.31<br>0.23-0.42 | 46<br>41-51     | 87<br>82-90     | 60                |
| <b>CPSS = 3</b>                  | 60<br>54-66             | 77<br>73-81             | 2.63<br>2.17-3.19 | 0.52<br>0.44-0.61 | 56<br>50-62     | 80<br>76-83     | 35                |

\*In practice, positive is  $\geq 1$ . CPSS: Cincinnati Prehospital Stroke Scale; CI: Confidence Interval; PLR: positive likelihood ratio; NLR: negative likelihood ratio; PPV: positive predictive value; NPV: negative predictive value

**Supplemental Table 3.** Diagnostic test parameters of each C-STAT scale threshold.

| Scale threshold                   | Sensitivity %<br>95% CI | Specificity %<br>95% CI | PLR<br>95% CI      | NLR<br>95% CI     | PPV %<br>95% CI | NPV %<br>95% CI | % of all patients |
|-----------------------------------|-------------------------|-------------------------|--------------------|-------------------|-----------------|-----------------|-------------------|
| <b>C-STAT <math>\geq 1</math></b> | 72<br>66-77             | 70<br>66-74             | 2.40<br>2.05-2.80  | 0.40<br>0.33-0.50 | 54<br>48-59     | 84<br>80-87     | 44                |
| <b>C-STAT <math>\geq 2</math></b> | 56<br>50-63             | 85<br>81-88             | 3.72<br>2.94-4.71  | 0.51<br>0.44-0.60 | 65<br>58-71     | 80<br>76-83     | 29                |
| <b>C-STAT <math>\geq 3</math></b> | 46<br>39-52             | 92<br>90-95             | 5.93<br>4.24-8.30  | 0.60<br>0.52-0.66 | 74<br>67-81     | 78<br>74-81     | 20                |
| <b>C-STAT = 4</b>                 | 19<br>14-24             | 98<br>96-99             | 8.39<br>4.42-15.90 | 0.83<br>0.78-0.89 | 80<br>68-90     | 71<br>68-75     | 8                 |

Cincinnati Stroke Assessment Triage; CI: Confidence Interval; PLR: positive likelihood ratio; NLR: negative likelihood ratio; PPV: positive predictive value; NPV: negative predictive value

**Supplemental Table 4.** Diagnostic test parameters of each EMSA scale threshold.

| Scale threshold                 | Sensitivity %<br>95% CI | Specificity %<br>95% CI | PLR<br>95% CI      | NLR<br>95% CI     | PPV %<br>95% CI | NPV %<br>95% CI | % of all patients |
|---------------------------------|-------------------------|-------------------------|--------------------|-------------------|-----------------|-----------------|-------------------|
| <b>EMSA <math>\geq 1</math></b> | 95<br>91-97             | 26<br>22-30             | 1.28<br>1.21-1.36  | 0.21<br>0.12-0.36 | 38<br>35-43     | 91<br>85-95     | 81                |
| <b>EMSA <math>\geq 2</math></b> | 91<br>87-95             | 38<br>34-43             | 1.48<br>1.37-1.60  | 0.23<br>0.15-0.35 | 42<br>38-46     | 90<br>85-94     | 71                |
| <b>EMSA <math>\geq 3</math></b> | 82<br>77-87             | 54<br>50-59             | 1.80<br>1.60-2.01  | 0.33<br>0.25-0.44 | 47<br>42-52     | 86<br>82-90     | 58                |
| <b>EMSA <math>\geq 4</math></b> | 73<br>67-79             | 70<br>66-74             | 2.47<br>2.11-2.89  | 0.38<br>0.31-0.48 | 55<br>49-60     | 84<br>80-88     | 44                |
| <b>EMSA <math>\geq 5</math></b> | 55<br>48-61             | 82<br>79-86             | 3.07<br>2.46-3.84  | 0.55<br>0.48-0.64 | 60<br>53-67     | 79<br>75-82     | 30                |
| <b>EMSA = 6</b>                 | 36<br>30-43             | 96<br>94-98             | 9.39<br>5.86-15.00 | 0.67<br>0.60-0.73 | 82<br>73-89     | 76<br>72-79     | 14                |

Emergency Medical Stroke Assessment; CI: Confidence Interval; PLR: positive likelihood ratio; NLR: negative likelihood ratio; PPV: positive predictive value; NPV: negative predictive value

**Supplemental Table 5.** Diagnostic test parameters of each FAST-ED scale threshold.

| Scale threshold                    | Sensitivity %<br>95% CI | Specificity %<br>95% CI | PLR<br>95% CI       | NLR<br>95% CI     | PPV %<br>95% CI | NPV %<br>95% CI | % of all patients |
|------------------------------------|-------------------------|-------------------------|---------------------|-------------------|-----------------|-----------------|-------------------|
| <b>FAST-ED <math>\geq 1</math></b> | 93<br>89-96             | 36<br>32-40             | 1.45<br>1.35-1.57   | 0.20<br>0.12-0.31 | 42<br>37-46     | 91<br>86-95     | 73                |
| <b>FAST-ED <math>\geq 2</math></b> | 84<br>79-88             | 64<br>60-68             | 2.34<br>2.05-2.67   | 0.25<br>0.19-0.34 | 53<br>48-58     | 89<br>85-92     | 52                |
| <b>FAST-ED <math>\geq 3</math></b> | 72<br>66-77             | 79<br>75-83             | 3.44<br>2.85-4.16   | 0.36<br>0.29-0.44 | 63<br>57-68     | 85<br>82-88     | 38                |
| <b>FAST-ED <math>\geq 4</math></b> | 61<br>55-67             | 89<br>86-92             | 5.48<br>4.19-7.17   | 0.44<br>0.37-0.52 | 73<br>66-79     | 82<br>79-86     | 27                |
| <b>FAST-ED <math>\geq 5</math></b> | 49<br>42-55             | 93<br>91-95             | 7.05<br>4.97-10.00  | 0.55<br>0.49-0.63 | 76<br>70-84     | 79<br>75-82     | 21                |
| <b>FAST-ED <math>\geq 6</math></b> | 30<br>25-37             | 97<br>95-98             | 9.98<br>5.58-17.00  | 0.72<br>0.66-0.78 | 83<br>73-90     | 74<br>71-77     | 12                |
| <b>FAST-ED <math>\geq 7</math></b> | 14<br>10-19             | 98<br>96-99             | 6.76<br>3.39-13.50  | 0.88<br>0.84-0.93 | 77<br>61-88     | 70<br>66-73     | 6                 |
| <b>FAST-ED <math>\geq 8</math></b> | 4<br>2-8                | 100<br>99-100           | 10.20<br>2.26-46.40 | 0.96<br>0.94-0.99 | 83<br>52-98     | 68<br>65-71     | 2                 |
| <b>FAST-ED = 9</b>                 | 2<br>0-4                | 100<br>99-100           | 8.2<br>0.92-73.00   | 0.99<br>0.97-1    | 80<br>28-100    | 68<br>64-71     | 1                 |

FAST-ED: Field Assessment Stroke Triage for Emergency Destination; CI: Confidence Interval; PLR: positive likelihood ratio; NLR: negative likelihood ratio; PPV: positive predictive value; NPV: negative predictive value

**Supplemental Table 6.** Diagnostic test parameters of each G-FAST scale threshold.

| Scale threshold                   | Sensitivity %<br>95% CI | Specificity %<br>95% CI | PLR<br>95% CI      | NLR<br>95% CI     | PPV %<br>95% CI | NPV %<br>95% CI | % of all patients |
|-----------------------------------|-------------------------|-------------------------|--------------------|-------------------|-----------------|-----------------|-------------------|
| <b>G-FAST <math>\geq 1</math></b> | 95<br>91-97             | 28<br>24-32             | 1.31<br>1.23-1.39  | 0.20<br>0.11-0.34 | 39<br>35-43     | 91<br>86-95     | 80                |
| <b>G-FAST <math>\geq 2</math></b> | 85<br>80-89             | 50<br>46-55             | 1.71<br>1.54-1.89  | 0.30<br>0.22-0.41 | 46<br>41-50     | 87<br>83-91     | 61                |
| <b>G-FAST <math>\geq 3</math></b> | 72<br>66-77             | 72<br>68-76             | 2.57<br>2.18-3.02  | 0.39<br>0.32-48   | 56<br>50-61     | 84<br>80-87     | 42                |
| <b>G-FAST = 4</b>                 | 42<br>35-48             | 94<br>92-96             | 7.32<br>4.96-10.80 | 0.62<br>0.56-0.69 | 78<br>70-85     | 77<br>73-80     | 17                |

G-FAST: Gaze-face-arm-speech-time; CI: Confidence Interval; PLR: positive likelihood ratio; NLR: negative likelihood ratio; PPV: positive predictive value; NPV: negative predictive value

**Supplemental Table 7.** Diagnostic test parameters of each mNIHSS threshold up to 20.

| Scale threshold                    | Sensitivity %<br>95% CI | Specificity %<br>95% CI | PLR<br>95% CI      | NLR<br>95% CI     | PPV %<br>95% CI | NPV %<br>95% CI | % of all patients |
|------------------------------------|-------------------------|-------------------------|--------------------|-------------------|-----------------|-----------------|-------------------|
| <b>mNIHSS <math>\geq 1</math></b>  | 94<br>90-97             | 27<br>23-31             | 1.29<br>1.21-1.37  | 0.22<br>0.13-0.37 | 39<br>35-43     | 91<br>85-95     | 80                |
| <b>mNIHSS <math>\geq 2</math></b>  | 87<br>82-91             | 51<br>46-55             | 1.76<br>1.59-1.95  | 0.26<br>0.19-0.37 | 46<br>42-51     | 89<br>84-92     | 61                |
| <b>mNIHSS <math>\geq 3</math></b>  | 81<br>76-86             | 62<br>58-66             | 2.15<br>1.89-2.44  | 0.30<br>0.23-0.40 | 51<br>46-56     | 87<br>83-91     | 52                |
| <b>mNIHSS <math>\geq 4</math></b>  | 77<br>71-82             | 69<br>64-73             | 2.45<br>2.11-2.84  | 0.34<br>0.27-0.43 | 54<br>49-60     | 86<br>82-89     | 46                |
| <b>mNIHSS <math>\geq 5</math></b>  | 71<br>65-77             | 75<br>70-78             | 2.78<br>2.34-3.30  | 0.39<br>0.32-0.48 | 58<br>52-63     | 84<br>80-87     | 40                |
| <b>mNIHSS <math>\geq 6</math></b>  | 67<br>61-73             | 79<br>75-83             | 3.22<br>2.66-3.91  | 0.41<br>0.34-0.50 | 61<br>55-67     | 83<br>80-87     | 36                |
| <b>mNIHSS <math>\geq 7</math></b>  | 64<br>58-70             | 82<br>79-86             | 3.63<br>2.93-4.49  | 0.44<br>0.37-0.52 | 64<br>68-70     | 82<br>79-86     | 33                |
| <b>mNIHSS <math>\geq 8</math></b>  | 59<br>53-66             | 85<br>82-88             | 4.02<br>3.17-5.08  | 0.48<br>0.41-0.56 | 66<br>60-73     | 81<br>78-84     | 29                |
| <b>mNIHSS <math>\geq 9</math></b>  | 57<br>51-64             | 90<br>87-92             | 5.66<br>4.26-7.52  | 0.48<br>0.41-0.55 | 73<br>67-80     | 81<br>78-84     | 26                |
| <b>mNIHSS <math>\geq 10</math></b> | 53<br>46-59             | 92<br>89-94             | 6.30<br>5.49-8.65  | 0.52<br>0.46-0.60 | 75<br>68-82     | 80<br>76-83     | 23                |
| <b>mNIHSS <math>\geq 11</math></b> | 46<br>40-53             | 93<br>90-95             | 6.50<br>4.59-9.20  | 0.58<br>0.52-0.65 | 76<br>68-83     | 78<br>74-81     | 20                |
| <b>mNIHSS <math>\geq 12</math></b> | 41<br>34-47             | 94<br>91-96             | 6.70<br>4.58-9.78  | 0.63<br>0.57-0.70 | 77<br>68-84     | 76<br>73-80     | 17                |
| <b>mNIHSS <math>\geq 13</math></b> | 35<br>29-42             | 95<br>92-97             | 6.70<br>4.44-10.10 | 0.68<br>0.62-0.75 | 77<br>68-84     | 75<br>71-78     | 15                |
| <b>mNIHSS <math>\geq 14</math></b> | 26<br>21-32             | 96<br>93-97             | 5.87<br>3.70-9.30  | 0.77<br>0.72-0.84 | 74<br>64-83     | 73<br>69-76     | 12                |
| <b>mNIHSS <math>\geq 15</math></b> | 22<br>17-28             | 97<br>95-98             | 6.92<br>4.05-11.80 | 0.80<br>0.75-0.86 | 77<br>66-86     | 72<br>68-75     | 10                |
| <b>mNIHSS <math>\geq 16</math></b> | 17<br>13-23             | 97<br>95-98             | 6.15<br>3.43-11.00 | 0.85<br>0.80-0.90 | 75<br>62-86     | 71<br>67-74     | 8                 |
| <b>mNIHSS <math>\geq 17</math></b> | 14<br>10-19             | 98<br>96-99             | 6.76<br>3.39-13.50 | 0.88<br>84-0.93   | 77<br>61-88     | 70<br>66-73     | 6                 |
| <b>mNIHSS <math>\geq 18</math></b> | 12<br>8-16              | 98<br>96-99             | 6.38<br>3.06-13.30 | 0.90<br>0.86-0.95 | 76<br>59-88     | 70<br>66-73     | 5                 |
| <b>mNIHSS <math>\geq 19</math></b> | 9<br>5-13               | 98<br>97-99             | 5.38<br>2.42-12.00 | 0.93<br>0.89-0.97 | 72<br>53-87     | 69<br>65-72     | 4                 |
| <b>mNIHSS <math>\geq 20</math></b> | 7<br>4-11               | 99<br>97-99             | 4.69<br>1.95-11.20 | 0.95<br>0.91-0.98 | 70<br>47-87     | 68<br>65-72     | 3                 |

mNIHSS: Modified National Institutes of Health Stroke Scale; CI: Confidence Interval; PLR: positive likelihood ratio; NLR: negative likelihood ratio; PPV: positive predictive value; NPV: negative predictive value

**Supplemental Table 8.** Diagnostic test parameters of each NIHSS threshold up to 20.

| Scale threshold                   | Sensitivity %<br>95% CI | Specificity %<br>95% CI | PLR<br>95% CI      | NLR<br>95% CI     | PPV %<br>95% CI | NPV %<br>95% CI | % of all patients |
|-----------------------------------|-------------------------|-------------------------|--------------------|-------------------|-----------------|-----------------|-------------------|
| <b>NIHSS <math>\geq 1</math></b>  | 96<br>93-98             | 17<br>14-21             | 1.16<br>1.11-1.22  | 0.22<br>0.11-0.42 | 36<br>33-40     | 90<br>83-96     | 87                |
| <b>NIHSS <math>\geq 2</math></b>  | 93<br>89-96             | 31<br>27-35             | 1.35<br>1.26-1.44  | 0.23<br>0.14-0.37 | 40<br>36-44     | 90<br>85-94     | 77                |
| <b>NIHSS <math>\geq 3</math></b>  | 91<br>86-94             | 44<br>39-48             | 1.61<br>1.47-1.76  | 0.22<br>0.15-0.33 | 44<br>40-48     | 90<br>86-94     | 67                |
| <b>NIHSS <math>\geq 4</math></b>  | 87<br>82-91             | 55<br>51-60             | 1.95<br>1.75-2.17  | 0.23<br>0.17-0.33 | 49<br>44-54     | 90<br>86-93     | 59                |
| <b>NIHSS <math>\geq 5</math></b>  | 81<br>75-86             | 63<br>58-67             | 2.16<br>1.90-2.46  | 0.31<br>0.23-0.40 | 51<br>46-56     | 87<br>83-90     | 52                |
| <b>NIHSS <math>\geq 6</math></b>  | 76<br>70-81             | 69<br>65-73             | 2.45<br>2.11-2.85  | 0.35<br>0.28-0.45 | 55<br>49-60     | 85<br>81-89     | 45                |
| <b>NIHSS <math>\geq 7</math></b>  | 72<br>66-78             | 74<br>70-78             | 2.76<br>2.34-3.27  | 0.38<br>0.31-0.46 | 57<br>52-63     | 85<br>81-88     | 41                |
| <b>NIHSS <math>\geq 8</math></b>  | 70<br>64-75             | 79<br>75-82             | 3.25<br>2.69-3.92  | 0.39<br>0.32-0.47 | 61<br>55-67     | 84<br>81-87     | 37                |
| <b>NIHSS <math>\geq 9</math></b>  | 67<br>61-73             | 81<br>78-85             | 3.59<br>2.92-4.40  | 0.41<br>0.34-0.49 | 64<br>57-70     | 83<br>80-87     | 34                |
| <b>NIHSS <math>\geq 10</math></b> | 64<br>57-70             | 84<br>81-88             | 4.07<br>3.25-5.11  | 0.43<br>0.37-0.51 | 67<br>60-73     | 83<br>79-86     | 31                |
| <b>NIHSS <math>\geq 11</math></b> | 61<br>55-67             | 88<br>85-91             | 5.02<br>3.88-6.50  | 0.44<br>0.38-0.52 | 71<br>64-77     | 82<br>79-85     | 28                |
| <b>NIHSS <math>\geq 12</math></b> | 56<br>50-62             | 90<br>87-83             | 5.77<br>4.31-7.71  | 0.49<br>0.42-0.56 | 74<br>67-80     | 81<br>77-84     | 25                |
| <b>NIHSS <math>\geq 13</math></b> | 52<br>45-58             | 92<br>89-94             | 6.20<br>4.51-8.52  | 0.53<br>0.46-0.61 | 75<br>68-82     | 80<br>76-83     | 22                |
| <b>NIHSS <math>\geq 14</math></b> | 48<br>41-54             | 93<br>90-95             | 6.37<br>4.55-8.92  | 0.57<br>0.50-0.64 | 76<br>68-82     | 78<br>75-82     | 21                |
| <b>NIHSS <math>\geq 15</math></b> | 42<br>35-48             | 94<br>92-96             | 7.07<br>4.82-10.04 | 0.62<br>0.56-0.69 | 78<br>69-84     | 77<br>73-80     | 18                |
| <b>NIHSS <math>\geq 16</math></b> | 38<br>32-45             | 95<br>93-97             | 8.20<br>5.33-12.60 | 0.65<br>0.59-0.72 | 80<br>72-87     | 76<br>72-79     | 16                |
| <b>NIHSS <math>\geq 17</math></b> | 32<br>36-38             | 96<br>93-97             | 7.08<br>4.52-11.10 | 0.72<br>0.66-0.78 | 78<br>68-85     | 74<br>71-78     | 13                |
| <b>NIHSS <math>\geq 18</math></b> | 25<br>20-31             | 96<br>94-98             | 6.47<br>3.96-10.60 | 0.78<br>0.73-0.84 | 76<br>65-85     | 72<br>69-76     | 11                |
| <b>NIHSS <math>\geq 19</math></b> | 19<br>14-25             | 97<br>95-98             | 6.29<br>3.58-11.00 | 0.83<br>0.78-0.89 | 75<br>63-86     | 71<br>68-75     | 8                 |
| <b>NIHSS <math>\geq 20</math></b> | 15<br>11-20             | 98<br>96-99             | 6.15<br>3.26-11.60 | 0.87<br>0.83-0.92 | 75<br>60-86     | 70<br>67-74     | 7                 |

NIHSS: National Institutes of Health Stroke Scale; CI: Confidence Interval; PLR: positive likelihood ratio; NLR: negative likelihood ratio; PPV: positive predictive value; NPV: negative predictive value

**Supplemental Table 9.** Diagnostic test parameters of each PASS scale threshold.

| Scale threshold | Sensitivity %<br>95% CI | Specificity %<br>95% CI | PLR<br>95% CI      | NLR<br>95% CI     | PPV %<br>95% CI | NPV %<br>95% CI | % of all patients |
|-----------------|-------------------------|-------------------------|--------------------|-------------------|-----------------|-----------------|-------------------|
| <b>PASS ≥1</b>  | 89<br>84-93             | 43<br>39-48             | 1.56<br>1.43-1.71  | 0.26<br>0.18-0.38 | 43<br>39-48     | 89<br>84-93     | 67                |
| <b>PASS ≥2</b>  | 65<br>59-71             | 82<br>79-86             | 3.66<br>2.96-4.51  | 0.42<br>0.36-0.51 | 64<br>58-70     | 83<br>79-86     | 33                |
| <b>PASS = 3</b> | 29<br>23-35             | 96<br>94-98             | 7.17<br>4.47-11.50 | 0.74<br>0.68-0.80 | 78<br>68-86     | 74<br>70-77     | 12                |

PASS: Prehospital Acute Stroke Severity; CI: Confidence Interval; PLR: positive likelihood ratio; NLR: negative likelihood ratio; PPV: positive predictive value; NPV: negative predictive value

**Supplemental Table 10.** Diagnostic test parameters of each RACE scale threshold.

| Scale threshold | Sensitivity %<br>95% CI | Specificity %<br>95% CI | PLR<br>95% CI       | NLR<br>95% CI     | PPV %<br>95% CI | NPV %<br>95% CI | % of all patients |
|-----------------|-------------------------|-------------------------|---------------------|-------------------|-----------------|-----------------|-------------------|
| <b>RACE ≥1</b>  | 88<br>84-92             | 42<br>37-46             | 1.51<br>1.38-1.65   | 0.28<br>0.20-0.40 | 42<br>38-47     | 91<br>83-92     | 68                |
| <b>RACE ≥2</b>  | 77<br>71-82             | 64<br>60-68             | 2.14<br>1.87-2.46   | 0.36<br>0.29-0.46 | 51<br>46-56     | 85<br>81-89     | 49                |
| <b>RACE ≥3</b>  | 66<br>60-72             | 77<br>73-81             | 2.93<br>2.43-3.53   | 0.44<br>0.36-0.52 | 59<br>53-65     | 83<br>79-86     | 37                |
| <b>RACE ≥4</b>  | 60<br>54-66             | 83<br>79-86             | 3.46<br>2.78-4.30   | 0.48<br>0.41-0.57 | 63<br>56-69     | 81<br>77-84     | 31                |
| <b>RACE ≥5</b>  | 54<br>47-60             | 87<br>84-90             | 4.26<br>3.29-5.54   | 0.53<br>0.46-0.61 | 68<br>60-74     | 79<br>76-83     | 26                |
| <b>RACE ≥6</b>  | 49<br>43-56             | 90<br>87-93             | 5.04<br>3.74-6.79   | 0.57<br>0.50-0.64 | 71<br>64-78     | 78<br>75-82     | 23                |
| <b>RACE ≥7</b>  | 38<br>32-45             | 94<br>92-96             | 6.74<br>4.54-9.99   | 0.66<br>0.59-0.73 | 77<br>68-84     | 76<br>72-79     | 16                |
| <b>RACE ≥8</b>  | 22<br>17-28             | 98<br>97-99             | 12.30<br>6.18-24.50 | 0.79<br>0.74-0.85 | 86<br>75-93     | 72<br>69-76     | 9                 |
| <b>RACE = 9</b> | 12<br>9-17              | 100<br>99-100           | 30.70<br>7.41-128   | 0.88<br>0.84-0.92 | 94<br>79-99     | 70<br>66-73     | 4                 |

RACE: Rapid Arterial Occlusion Evaluation; CI: Confidence Interval; PLR: positive likelihood ratio; NLR: negative likelihood ratio; PPV: positive predictive value; NPV: negative predictive value

**Supplemental Table 11.** Diagnostic test parameters of each VAN scale threshold.

| Scale threshold | Sensitivity %<br>95% CI | Specificity %<br>95% CI | PLR<br>95% CI     | NLR<br>95% CI     | PPV %<br>95% CI | NPV %<br>95% CI | % of all patients |
|-----------------|-------------------------|-------------------------|-------------------|-------------------|-----------------|-----------------|-------------------|
| <b>VAN = 1</b>  | 72<br>66-77             | 77<br>73-81             | 3.17<br>2.64-3.79 | 0.37<br>0.30-0.45 | 61<br>55-66     | 85<br>81-88     | 39                |

VAN: Vision Aphasia Neglect; CI: Confidence Interval; PLR: positive likelihood ratio; NLR: negative likelihood ratio; PPV: positive predictive value; NPV: negative predictive value

**Supplemental Table 12.** Diagnostic test parameters of each 3I-SS threshold.

| Scale threshold | Sensitivity %<br>95% CI | Specificity %<br>95% CI | PLR<br>95% CI      | NLR<br>95% CI     | PPV %<br>95% CI | NPV %<br>95% CI | % of all patients |
|-----------------|-------------------------|-------------------------|--------------------|-------------------|-----------------|-----------------|-------------------|
| <b>3I-SS ≥1</b> | 84<br>79-88             | 45<br>41-50             | 1.53<br>1.39-1.68  | 0.36<br>0.27-0.49 | 43<br>38-47     | 85<br>80-89     | 64                |
| <b>3I-SS ≥2</b> | 65<br>58-71             | 79<br>75-83             | 3.07<br>2.53-3.73  | 0.48<br>0.38-0.53 | 60<br>54-66     | 82<br>78-85     | 35                |
| <b>3I-SS ≥3</b> | 47<br>41-54             | 92<br>89-94             | 5.79<br>4.18-8.02  | 0.58<br>0.51-0.65 | 74<br>66-81     | 78<br>74-81     | 21                |
| <b>3I-SS ≥4</b> | 24<br>19-30             | 97<br>95-98             | 7.43<br>4.37-12.60 | 78<br>67-87       | 72<br>69-87     | 72<br>69-76     | 10                |
| <b>3I-SS ≥5</b> | 8<br>5-12               | 99<br>97-100            | 6.49<br>2.63-16.00 | 0.93<br>0.90-0.97 | 76<br>55-91     | 69<br>65-72     | 3                 |
| <b>3I-SS =6</b> | 3<br>1-6                | 100<br>99-100           | 8.20<br>1.75-38.3  | 0.97<br>0.95-0.99 | 80<br>44-98     | 68<br>64-71     | 1                 |

3I-SS: 3-Item Stroke Scale; CI: Confidence Interval; PLR: positive likelihood ratio; NLR: negative likelihood ratio; PPV: positive predictive value; NPV: negative predictive value
